# Supplementary material
Source: PubMed Central journal article supplement (PMC4909253)
Supplement: NIHMS789580-supplement-supplement.pdf [file NIHMS789580-supplement-supplement.pdf]

Online supporting information for the following article published in Indoor Air

DOI: 10.1111/ina.12085

## **Home interventions are effective at decreasing indoor nitrogen dioxide concentrations**

Laura M Paulin<sup>1</sup>, Gregory B Diette<sup>1,2</sup>, Meagan Scott<sup>1</sup>, Meredith C McCormack<sup>1,2</sup>, Elizabeth C Matsui<sup>3</sup>, Jean Curtin-Brosnan<sup>3</sup>, D'Ann L Williams<sup>2</sup>, Andrea Kidd Taylor<sup>4</sup>, Madeleine Shea<sup>5</sup>, Patrick N Breysse<sup>2</sup>, Nadia N Hansel<sup>1,2</sup>

<sup>1</sup>Department of Medicine, School of Medicine, Johns Hopkins University, Baltimore, MD 21205; <sup>2</sup>Department of Environmental Health Sciences, Bloomberg School of Public Health, Johns Hopkins University, Baltimore, MD 21205; <sup>3</sup>Department of Pediatrics, School of Medicine, Johns Hopkins University, Baltimore, MD 21205; <sup>4</sup>Department of Health Policy and Management, School of Community and Health Policy, Morgan State University, Baltimore, MD 21251; <sup>5</sup>Delmarva Foundation, Columbia, Maryland 21046

Correspondence to: Nadia N Hansel (nhansel1@jhmi.edu)

**Supplemental Table 1: Percentage of homes at each sampling visit with a decrease in median indoor NO<sub>2</sub> following intervention**

| <b>Percentage of homes with decrease in NO<sub>2</sub>*</b> | <b>1 week</b> | <b>3 months</b> |
|-------------------------------------------------------------|---------------|-----------------|
| <b>KITCHEN</b>                                              |               |                 |
| Air purifier (n=46)                                         | 76.1%         | 65.9%           |
| Ventilation hood (n=15)                                     | 35.7%         | 26.7%           |
| Stove (n=17)                                                | 68.8%         | 87.5%           |
| <b>BEDROOM</b>                                              |               |                 |
| Air purifier (n=46)                                         | 60.9%         | 53.7%           |
| Ventilation hood (n=15)                                     | 64.3%         | 29.6%           |
| Stove (n=17)                                                | 68.8%         | 75.0%           |

\*By chance alone, 50% of homes would be expected to have a reduction in NO<sub>2</sub> concentrations.

Supplemental Table 1: Percentage of homes at each sampling visit with a decrease in median NO<sub>2</sub> following intervention. Lists the percentage of homes within each study group (stove replacement, air purifier, ventilation hood) that had a decrease in NO<sub>2</sub> concentration at 1 week and 3 months of follow up, shown for both kitchen and bedroom. (NO<sub>2</sub>=nitrogen dioxide)

**Supplemental Table 2: Median indoor NO<sub>2</sub> by location, study arm, and sampling visit**

| <b>KITCHEN<br/>NO<sub>2</sub> (ppb)<br/>Median<br/>(range)</b> | Baseline         | 1 Week           | Mann-Whitney Wilcoxon signed rank test p-value WITHIN GROUP | 3 months         | Mann-Whitney Wilcoxon signed rank test p-value WITHIN GROUP |
|----------------------------------------------------------------|------------------|------------------|-------------------------------------------------------------|------------------|-------------------------------------------------------------|
| Air purifier (n=46)                                            | 19.2 (6.8, 85.3) | 14.1 (2.7, 58.6) | <b>&lt;0.01</b>                                             | 15.5 (0.1, 74.7) | <b>0.05</b>                                                 |
| Ventilation hood (n=15)                                        | 12.2 (3.2, 53.3) | 25.5 (4.7, 51.2) | 0.14                                                        | 24.7 (6.5, 49.8) | 0.11                                                        |
| Stove (n=17)                                                   | 19.7 (9.2, 70.2) | 10.9 (4.3, 98.6) | 0.18                                                        | 9.7 (3.4, 36.9)  | <b>0.01</b>                                                 |
| Kruskal-Wallis test p-value BETWEEN GROUPS                     | 0.21             | <b>0.04</b>      |                                                             | <b>&lt;0.01</b>  |                                                             |
|                                                                |                  |                  |                                                             |                  |                                                             |
| <b>BEDROOM<br/>NO<sub>2</sub> (ppb)<br/>Median<br/>(range)</b> | Baseline         | 1 Week           | Mann-Whitney Wilcoxon signed rank test p-value WITHIN GROUP | 3 months         | Mann-Whitney Wilcoxon signed rank test p-value WITHIN GROUP |
| Air purifier (n=46)                                            | 12.4 (3.4, 35.1) | 9.7 (1.9, 38.3)  | <b>0.02</b>                                                 | 11.5 (3.2, 92.6) | 0.41                                                        |
| Ventilation hood (n=15)                                        | 13.1 (5.3, 39.2) | 14.2 (3.1, 41.7) | 0.68                                                        | 18.2 (5.7, 35.5) | 0.18                                                        |
| Stove (n=17)                                                   | 16.9 (6.9, 41.8) | 11.6 (4.9, 40.8) | 0.23                                                        | 9.8 (2.3, 21.9)  | <b>0.01</b>                                                 |
| Kruskal-Wallis test p-value BETWEEN GROUPS                     | 0.68             | 0.35             |                                                             | <b>0.03</b>      |                                                             |

Supplemental Table 2: Median indoor NO<sub>2</sub> by location, study arm, and sampling visit. Lists median and range of indoor NO<sub>2</sub> concentrations for each room (kitchen and bedroom) by study arm (stove replacement, air purifier, ventilation hood) and for each monitoring visit (baseline, 1 week, 3 month). (NO<sub>2</sub>=nitrogen dioxide, ppb=parts per billion)

**Supplemental Table 3: Median ambient NO<sub>2</sub> by study arm and sampling visit**

|                                                                                     | Ambient NO <sub>2</sub> (ppb) |        |         |                                                                                                  |
|-------------------------------------------------------------------------------------|-------------------------------|--------|---------|--------------------------------------------------------------------------------------------------|
|                                                                                     | Baseline                      | 1-week | 3-month | Kruskal-Wallis test p-value for differences in ambient NO <sub>2</sub> at baseline and follow-up |
| All groups combined                                                                 | 28.8                          | 29.8   | 28.9    | 0.71                                                                                             |
| Air purifier                                                                        | 28.3                          | 29.4   | 28.3    | 0.68                                                                                             |
| Ventilation hood                                                                    | 31.5                          | 31.6   | 29.3    | 0.46                                                                                             |
| Stove replacement                                                                   | 26.3                          | 29.8   | 29.8    | 0.39                                                                                             |
| Kruskal-Wallis test p-value for differences in ambient NO <sub>2</sub> by study arm | 0.14                          | 0.58   | 0.85    |                                                                                                  |

Supplemental Table 3: Median ambient NO<sub>2</sub> by study arm and sampling visit. Lists value of median ambient NO<sub>2</sub> concentration from the Baltimore City EPA monitoring site, by study arm (stove replacement, air purifier, ventilation hood) and for each monitoring visit (baseline, 1 week, 3 month). (NO<sub>2</sub>=nitrogen dioxide, ppb=parts per billion)

**Supplemental Table 4: Median change in NO<sub>2</sub> (ppb) by pilot light**

|                                 | Kitchen         |                   | Bedroom         |                   |
|---------------------------------|-----------------|-------------------|-----------------|-------------------|
| <b>Air purifier</b>             | 1 week-baseline | 3 months-baseline | 1 week-baseline | 3 months-baseline |
| Continuous pilot light<br>n=11  | -3.3            | -6.6              | -4.9            | -0.1              |
| Auto ignite pilot light<br>n=34 | -1.5            | -2.0              | -1.3            | -0.9              |
| Krushkal-Wallis test<br>p-value | <b>0.04</b>     | 0.37              | 0.07            | 0.98              |
|                                 | Kitchen         |                   | Bedroom         |                   |
| <b>Vent hood</b>                | 1 week-baseline | 3 months-baseline | 1 week-baseline | 3 months-baseline |
| Continuous pilot light<br>n=3   | 7.3             | 9.9               | -1.3            | 5.6               |
| Auto ignite pilot light<br>n=12 | 7.1             | 8.6               | -1.9            | 1.1               |
| Krushkal-Wallis test<br>p-value | 0.39            | 1.0               | 0.94            | 0.70              |
|                                 | Kitchen         |                   | Bedroom         |                   |
| <b>Stove</b>                    | 1 week-baseline | 3 months-baseline | 1 week-baseline | 3 months-baseline |
| Continuous pilot light<br>n=5   | -10.4           | -8.0              | -4.3            | -16.0             |
| Auto ignite pilot light<br>n=11 | -3.2            | -9.5              | -1.2            | -5.0              |
| Krushkal-Wallis test<br>p-value | 0.33            | 0.61              | 0.40            | 0.13              |

Supplemental Table 4: Median change in NO<sub>2</sub> by presence of continuous pilot light, location, study arm, and sampling visit. Lists value of median change in NO<sub>2</sub> concentration between homes with a continuous pilot light and those with an auto ignite pilot light, for each room (kitchen and bedroom) by study arm (stove replacement, air purifier, ventilation hood) and for each monitoring visit (baseline, 1 week, 3 month). (NO<sub>2</sub>=nitrogen dioxide, ppb=parts per billion)
